# Supplementary material for: Movement Foundations. The perceived impact of a digital rehabilitation tool for returning to fitness following a period of illness, including COVID-19 infection: a qualitative study
Source: HighWire-hosted journal article supplement (doi:10.1136/bmjsem-2023-001557), 2023-04-01
Supplement: bmjsem-2023-001557supp003_data_supplement.pdf [file bmjsem-2023-001557supp003_data_supplement.pdf]

### Supplementary File 3: codes, subthemes and themes

| Code                                                                                                                                                                                                                                                                                                                                                                                                         | Subtheme                        | Themes                           |
|--------------------------------------------------------------------------------------------------------------------------------------------------------------------------------------------------------------------------------------------------------------------------------------------------------------------------------------------------------------------------------------------------------------|---------------------------------|----------------------------------|
| Being more aware and concentrating on certain parts of the body, Beneficial because I'm not used to exercise, Broad set of movements, Doing exercises that don't necessarily do, Exercises make you more aware of what muscles you are exercising, I'm not into exercising, knowing my limits, Mismatch between perception and reality, Monitoring wellbeing, Pattern of moving, Reclaiming ability to move, | Physical literacy               | Skills and capacity for movement |
| Am I doing it the right way, Apprehensive about starting, Baseline fitness, Engagement, Adding to physical activity repertoire after illness                                                                                                                                                                                                                                                                 | How to exercise                 |                                  |
| Accessibility, Exercises worked parts of my body that don't normally target, General impact, Muscles are stretched, Doing more exercise after doing MF, Doing new things, Reclaiming ability to move                                                                                                                                                                                                         | Increasing capacity/capability  |                                  |
| Exercises worked parts of my body that don't normally target, Exercising new muscle groups, Impact on core strength                                                                                                                                                                                                                                                                                          | Different and new muscle groups |                                  |

11/08/2022

Page 1 of 5

|                                                                                                                                                                                                                                                                                                                                                                                                                                                                  |                             |                                                     |
|------------------------------------------------------------------------------------------------------------------------------------------------------------------------------------------------------------------------------------------------------------------------------------------------------------------------------------------------------------------------------------------------------------------------------------------------------------------|-----------------------------|-----------------------------------------------------|
| Strength, Tone and strength as opposed to aerobic, Wanting to do aerobic exercise, Working all muscle groups                                                                                                                                                                                                                                                                                                                                                     | Different types of movement |                                                     |
| Conditioning, Cycle of increasing fitness and capacity, Exercise helping with resilience, Feeling stronger, Get into it as get used to it (gradual), Helping with stair climbing, Impact on ADL, Impact on core strength, Impact on fitness, Exercise for self-preservation                                                                                                                                                                                      | Conditioning for daily life |                                                     |
| Brain fog and covid, Impact on fatigue, Motivated to get back on track, Physical activity after covid, Put on weight with Covid,                                                                                                                                                                                                                                                                                                                                 | Impact of illness           | Opportunities, motivations and barriers to movement |
| Breaking sitting time, Busy job as barrier to being physically active, Forming habit, Incorporating exercises into daily life, More productive from being physically active, No need for special equipment, Realisation that can carve out time to be physically active, Spreading exercises over time,, Can focus on exercises, Children as barrier to time to be physically active, Clear and feasible to exercise in designated time, Being busy as a barrier | Opportunistic PA            |                                                     |

|                                                                                                                                                                                                                                                                                                                                                                                                                                                                                                                                                                                                                                                                                                                                                              |                                      |  |
|--------------------------------------------------------------------------------------------------------------------------------------------------------------------------------------------------------------------------------------------------------------------------------------------------------------------------------------------------------------------------------------------------------------------------------------------------------------------------------------------------------------------------------------------------------------------------------------------------------------------------------------------------------------------------------------------------------------------------------------------------------------|--------------------------------------|--|
| Able to schedule in exercises,<br>Allowed for crazy days, Time to<br>do the exercises, Timing,                                                                                                                                                                                                                                                                                                                                                                                                                                                                                                                                                                                                                                                               | Scheduling                           |  |
| Children contributing to fatigue,<br>Demotivating to see how<br>fatigued I am, Fatigue after covid,<br>Impact on fatigue,                                                                                                                                                                                                                                                                                                                                                                                                                                                                                                                                                                                                                                    | Fatigue                              |  |
| Doing other forms of<br>exercise, Impact of external<br>factors,                                                                                                                                                                                                                                                                                                                                                                                                                                                                                                                                                                                                                                                                                             | External factors                     |  |
| Being part of a study<br>helped someone focus on<br>physical activity, Feeling pressure<br>to exercise, Feeling stiff the next<br>day helps me feel I have done<br>something, Felt more motivated<br>as I went on, , I didnt have time, I<br>dont have the motivation and<br>time, I'm not into exercising,<br>Impact on mental health,<br>Monitoring wellbeing, ,<br>Motivated to exercise to feel<br>better, Motivated to get back on<br>track, Motivated to lose weight,<br>Motivation, Motivation to target<br>stress, Relaxation after exercise,<br>Spending time thinking about<br>exercise but not doing it, Thinking<br>about response gives motivation<br>and monitoring of progress,<br>Unless you have a natural<br>interest you will not engage, | Pressure, motivations and incentives |  |

11/08/2022

Page 3 of 5

|                                                                                                                                                                                                                                                                                                                                                                                                                                                                                                          |                                |                                                  |
|----------------------------------------------------------------------------------------------------------------------------------------------------------------------------------------------------------------------------------------------------------------------------------------------------------------------------------------------------------------------------------------------------------------------------------------------------------------------------------------------------------|--------------------------------|--------------------------------------------------|
| Used as a motivational tool,<br>Using it to help with motivation,                                                                                                                                                                                                                                                                                                                                                                                                                                        |                                |                                                  |
| Accessibility, Engagement,<br>Exercises are transportable,<br>Initiation, Logging into a website<br>presenting an extra barrier, No<br>need for special equipment, Not<br>having equipment to do<br>exercises, Not having space to do<br>exercises, Working all muscle<br>groups,                                                                                                                                                                                                                        | Accessibility                  |                                                  |
| Feel that straining more, Get into<br>it as get used to it (gradual),<br>Helpful to see my progress,                                                                                                                                                                                                                                                                                                                                                                                                     | Progress                       | A personalised safe space in which to<br>develop |
| Positive effects on me, Relaxation<br>after exercise, Harder to sleep<br>after exercise, Feeling happier,<br>Feeling more positive, Impact on<br>mental health                                                                                                                                                                                                                                                                                                                                           | Impacts, emotions and feelings |                                                  |
| don't think too much about how<br>you are feeling as doesnt truly<br>reflect, Exercises make you more<br>aware of what muscles you are<br>exercising, Hard to distinguish<br>how I'm feeling, Impact on core<br>strength, It made me feel less fit<br>than I thought I was, Knowing<br>what I have to work on, Making<br>more aware of stress, Monitoring<br>wellbeing, Proved that I needed<br>to get fitter, Seeing how I'm<br>doing as an aid to wellbeing, self-<br>reflection, Signposting to self, | Self-reflection                |                                                  |

|                                                                                                                                                                                                      |                        |  |
|------------------------------------------------------------------------------------------------------------------------------------------------------------------------------------------------------|------------------------|--|
| Understanding progress, Useful to have information available, Useful to see how I'm feeling,                                                                                                         |                        |  |
| Adapting the exercises for myself, Flexibility with exercises, Relevance or tailored for that person,                                                                                                | Tailoring              |  |
| Gentle, Graded approach, Not invasive, gives the chance to do it, Steadying hand, Step by step approach is useful, Surreptitious exercise, safe exercises unlikely to cause injury, Non-judgemental, | Gentle/graded          |  |
| Own pace no pressure, Permission to not push, Pushing and not pushing,                                                                                                                               | Pushing/not pushing    |  |
| Guiding hand, Impact on fitness, Structured,                                                                                                                                                         | Guidance and structure |  |
